# Supplementary material for: Preparation of functional magnetic porous organic polymer as sorbent for mercury speciation followed by HPLC-ICP-MS analysis
Source: Royal Society of Chemistry journal article supplement (doi:10.1039/d1ja00019e), 2021-01-01
Supplement: d1ja00019e1.pdf [file d1ja00019e1.pdf]

**Electronic Supplementary Information**

for

**Preparation of functional magnetic porous organic polymer as sorbents for  
mercury speciation followed by HPLC-ICP-MS analysis**

Yifeng He, Man He, Beibei Chen\*, Bin Hu

Sauvage Center for Molecular Sciences, College of Chemistry and Molecular Sciences,  
Wuhan University, Wuhan 430072, P R China

**Text S1-S3**

**Figure S1-S7**

**Table S1-S5**

---

\* Corresponding author. Tel.: +86 27 68752162; fax: +86 27 68754067.

E-mail address: bbchen@whu.edu.cn (B. Chen)

## Text S1. Reagents and Instrumentation

$\text{FeCl}_3 \cdot 6\text{H}_2\text{O}$  (Aladdin Industrial Corporation, Shanghai, China), benzidine (BD) (Saen Chemical Technical Co., Ltd., Shanghai, China), methacrylic anhydride (MA) (Aladdin Industrial Corporation, Shanghai, China), 2,4,6-triformylphloroglucinol (Tp) (Bide Pharmatech Co., Ltd., Shanghai, China), 1,2-ethanedithiol (Shanghai Macklin Biochemical Co., Ltd. Shanghai, China) were employed to prepare the sorbent. L-Cysteine (J&K Chemicals, Beijing, China),  $(\text{NH}_4)_2\text{HPO}_4$  (Shanghai Reagent, Shanghai, China) and triethylamine (Aladdin Industrial Corporation, Shanghai, China) were applied to prepare the mobile phase. 2, 2'-azobis(2-methylpropionitrile) (AIBN) was obtained from Aladdin (Shanghai, China).  $\text{HgCl}_2$  was purchased from Shanghai Reagent Factory (Shanghai, China), and other three mercury species of  $\text{MeHgCl}$ ,  $\text{EtHgCl}$  and  $\text{PhHgCl}$  were obtained from Alfa Aesar (Tianjin, China).

All the other reagents used were analytically pure reagents. All the aqueous solutions were prepared by high-purity deionized Milli-Q water (18.2 M $\Omega$  cm, Millipore, Molsheim, France). All the glassware could be used until they were soaked over 24 h in 20 % (v/v) nitric acid and washed with purity deionized water.

The prepared  $\text{Fe}_3\text{O}_4@\text{BD-TpMA-S-SH}$  MOPs was characterized by NEXUS 870 Fourier transform infrared spectroscopy (FT-IR) (Thermo, Madison, USA), JEM-2010 transmission electron microscope (TEM) (JEOL, Tokyo, Japan), X-ray photoelectron spectroscopy (XPS) (ESCALAB250Xi, Thermo Fisher, USA) and accelerated surface area and porosimetry system (ASAP2020, Micromeritics, USA). A Mettler Toledo 320-S pH meter (Mettler Toledo Instruments Co. Ltd. Shanghai, China) was used to control the pH values. The nanoparticles were dispersed in solution by A KQ5200DE model water bath ultrasonicator (Shumei Instrument Factory, Kunshan, China). The magnetic separation was realized by an Nd-Fe-B magnet (8.0 cm $\times$ 6.0 cm $\times$ 1.6 cm).

## Text S2. Preparation of $\text{Fe}_3\text{O}_4$ MNPs

The  $\text{Fe}_3\text{O}_4$  MNPs were prepared through a modified solvothermal reaction.<sup>1</sup> Briefly, 3.25 g  $\text{FeCl}_3 \cdot 6\text{H}_2\text{O}$ , 1.30 g trisodium citrate and 6.00 g NaAc were dissolved in 100 mL ethylene glycol. A homogeneous solution was obtained with vigorously stirring at 100 °C under nitrogen gas for 1

h, then transferred to a Teflon-lined stainless-steel autoclave. The autoclave was heated at 200 °C for 12 h. After cooled to room temperature, the product was washed with high purity deionized water and ethanol for several times, and then dried at 50 °C for further use.

### **Text S3. Optimization of MSPE Conditions**

#### **Effect of pH**

The effect of sample pH in the range of 2-8 on the adsorption of target mercury species on  $\text{Fe}_3\text{O}_4@\text{TpBD-MA-S-SH}$  MOPs was investigated, and the results are shown in Fig. S3(a). It can be seen that four target mercury species can be completely adsorbed (adsorption efficiency higher than 95%) on the MOPs in the entire studied pH range, indicating a good adsorption performance in a wide range of sample pH. To avoid hydrolysis of  $\text{Hg}^{2+}$  in neutral or alkaline solution, sample pH was adjusted to pH 4 in the following experiments.

#### **Effect of Eluent and Its Concentration**

According to our previous works,<sup>2,3</sup> thiourea prepared in diluted nitric acid was used as eluent to elute target mercury species retained on the MOPs. The effect of concentration of nitric acid in the range of 0-1.0 mol L<sup>-1</sup> (with 4% (m/v) thiourea) and thiourea in the range of 1-5% (m/v) (with 0.5 mol L<sup>-1</sup> nitric acid) on the recovery of target mercury species was investigated. The results demonstrate that four target mercury species can be quantitatively recovered (recovery > 80%) when the concentration of nitric acid and thiourea was higher than 0.3 mol L<sup>-1</sup> (Fig. S3(b)) and 3% (m/v) (Fig. S3(c)), respectively. Finally, 0.5 mol L<sup>-1</sup> nitric acid and 4% (m/v) thiourea solution was used as the eluent.

#### **Effect of Eluent Volume and Elution Time**

Fixing 0.5 mol L<sup>-1</sup> nitric acid and 4% (m/v) thiourea solution as the eluent, the effect of eluent volume ranged from 0.2 to 2.0 mL on the recovery of target mercury species was investigated. The

results shown in Fig. S3(d) indicate quantitative recovery of four target mercury species could be obtained when the eluent volume was equal to or higher than 0.5 mL. A lower eluent volume would lead to a higher enrichment factor (EF), therefore, 0.5 mL was chosen as the eluent volume.

The effect of elution time on the recovery of target mercury species was also studied. Four target mercury species adsorbed on the MOPs was subjected to ultrasonic elution for 1, 2, 3, 5, 10 min, respectively, and the recoveries are displayed in Fig. S4(a). It can be seen that the recoveries were higher than 80% in the whole tested range, indicating fast desorption dynamics. For subsequent experiment, elution time was selected as 2 min.

#### Effect of Sample Volume

Keep the amount of  $\text{Hg}^{2+}$ ,  $\text{MeHg}^+$ ,  $\text{EtHg}^+$  and  $\text{PhHg}^+$  as 10 ng in sample solution, and the effect of sample volume in the range of 10-250 mL on the recovery of target mercury species was studied. It was found in Fig. S4(b) that quantitative recovery of four target mercury species could be obtained when sample volume was in the range of 10-200 mL. When sample volume was 250 mL, the recovery of  $\text{PhHg}^+$  was slightly lower than 80%. To maintain good recoveries of mercury species, 200 mL sample solution was used for MSPE. With the eluent volume of 0.5 mL, the theoretical EF of the method is 400-fold.

#### Effect of MOPs Amount

The effect of the amount of MOPs on the recovery of target mercury species was investigated in the range of 1-15 mg, and the results are shown in Fig. S4(c). The recoveries of mercury species increased with increasing the MOPs amount from 1 to 5 mg, and then remained constantly ( $> 80\%$ ) with further increasing the MOPs amount to 15 mg. To guarantee quantitative adsorption of target mercury species, 7 mg MOPs was used as MSPE sorbent.

#### Effect of MOPs Adsorption Time

The effect of adsorption time (2, 3, 5, 10 min) on the recovery of target mercury species was studied. From Fig. S4(d), it can be seen that the recoveries of four mercury species increased when the adsorption time increased from 1 to 5 min, and then levelled off. Four target mercury species can be quantitatively recovered within 5 min, indicating a good adsorption dynamic. In the following experiments, adsorption time was chosen as 5 min.

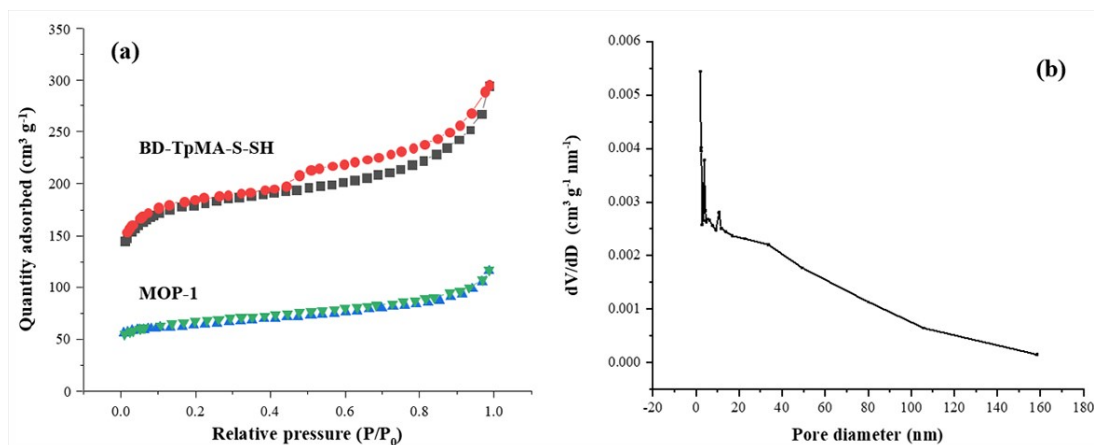

**Figure S1** N<sub>2</sub> adsorption/desorption isotherms of BD-TpMA-S-SH and MOP-1 (a) and pore size distribution of MOP-1 (b).

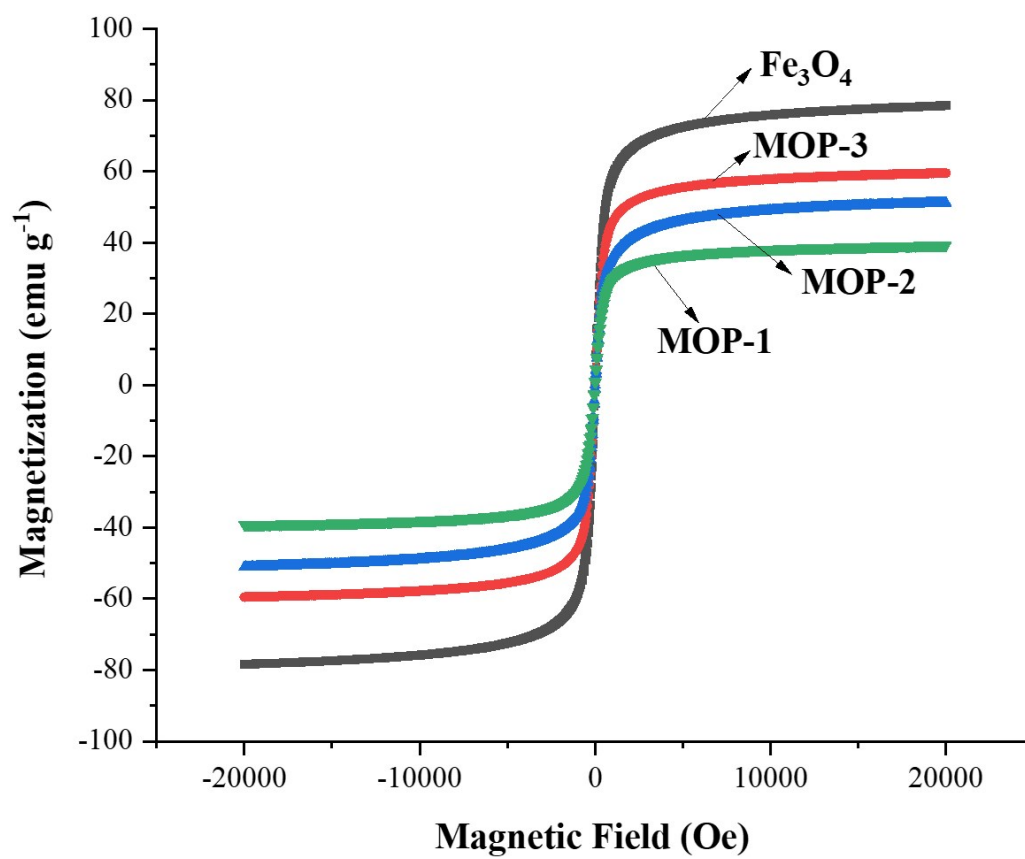

**Figure S2** VSM magnetization curves of Fe<sub>3</sub>O<sub>4</sub>@BD-TpMA-S-SH MOPs.

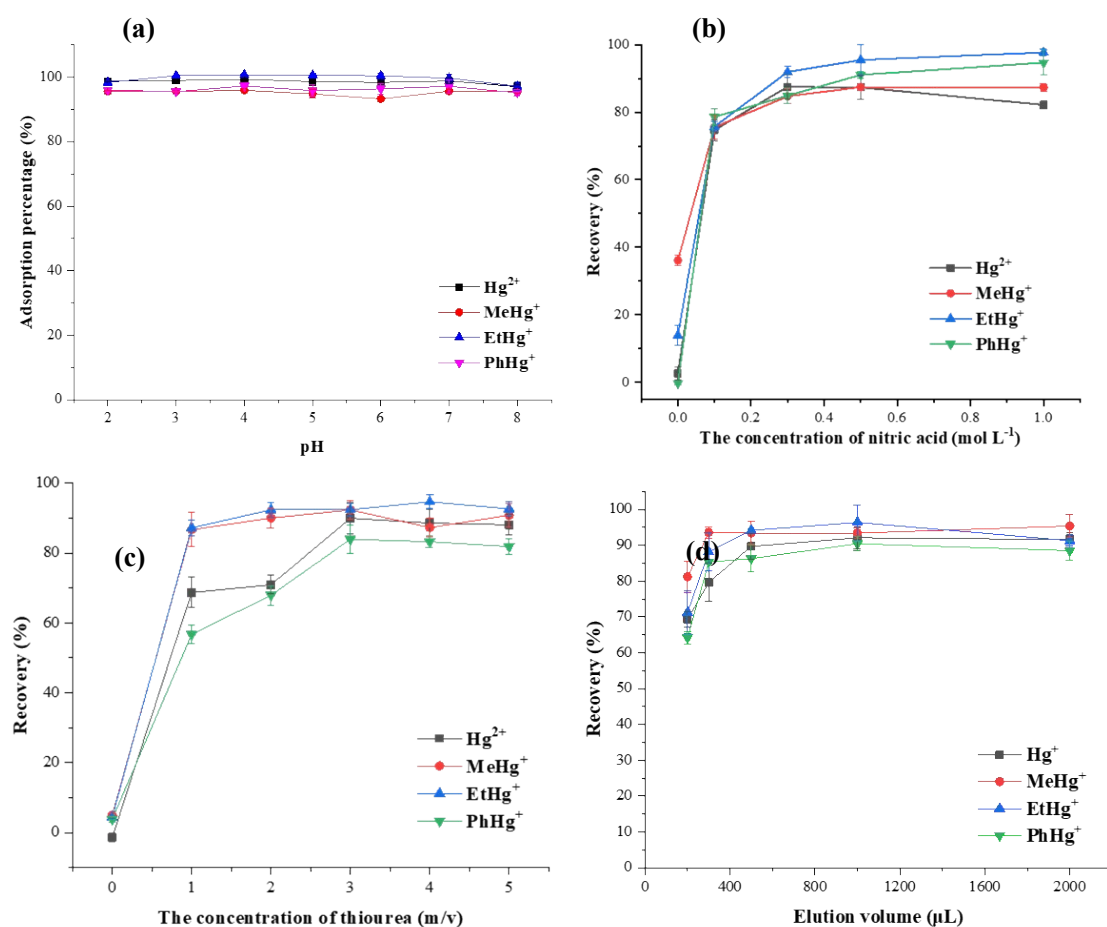

**Figure S3** The effect of sample pH on the adsorption efficiency of target mercury species (a), and the effect of the concentration of nitric acid (b) and thiourea (c) in the eluent, and the elution volume (d) on the recovery of target mercury species. Conditions: sample volume: 100 mL, MOPs amount: 10 mg, adsorption time: 15 min, eluent time: 2 min.

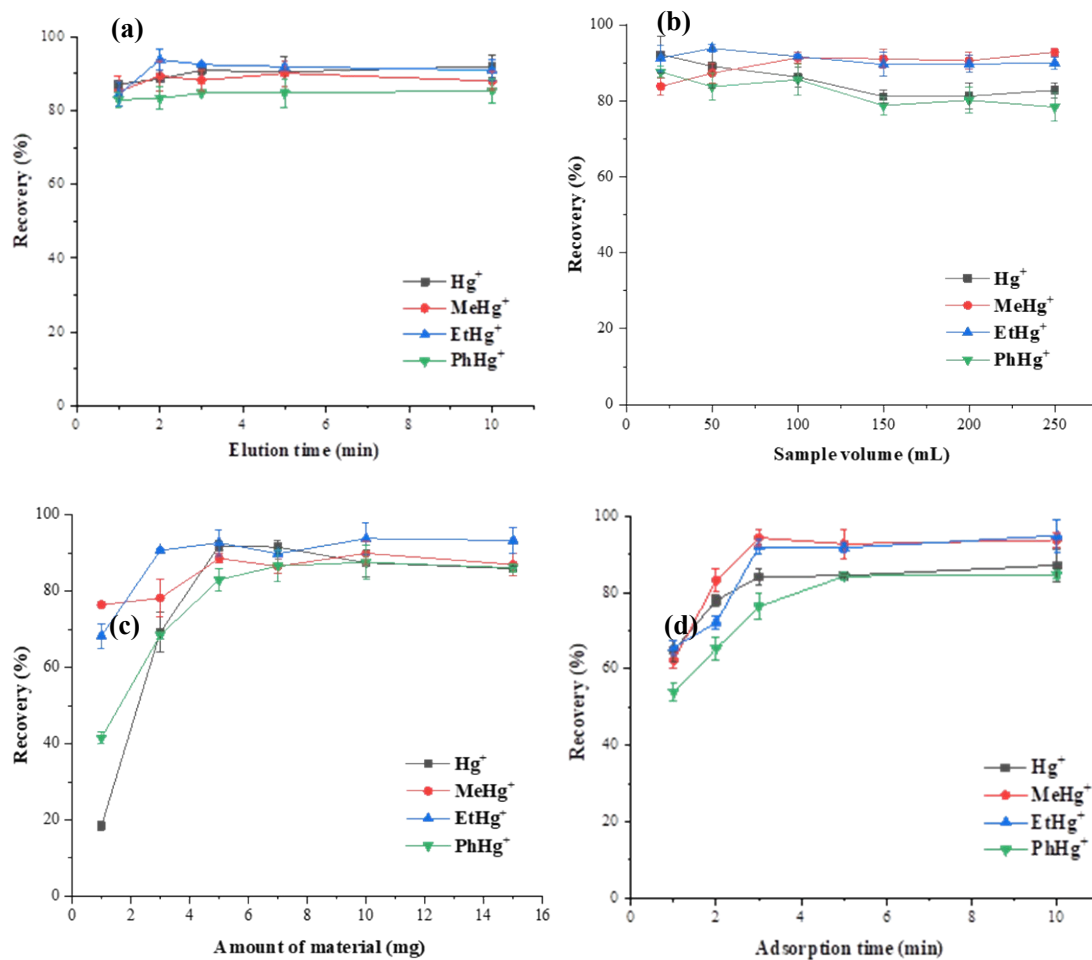

**Figure S4** The effect of elution time (a), sample volume (b), MOPs amount (c) and adsorption time (d) on the recovery of target mercury species. Conditions: sample pH: 4, eluent:  $0.5 \text{ mol L}^{-1}$  nitric acid and 4 % (m/v) thiourea elution, eluent volume: 0.5 mL, elution time: 2 min.



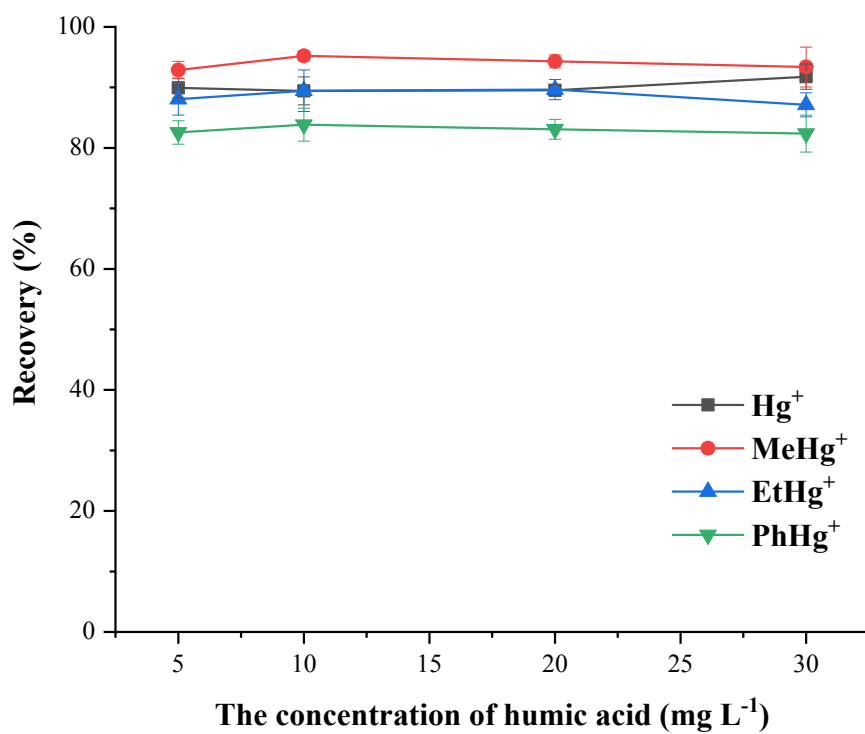

**Figure S5** The effect of humic acid concentration on the recovery of four mercury species.

Conditions: sample pH: 4, sample volume: 200 mL, MOPs amount: 7 mg, adsorption time: 5 min, eluent: 0.5 mol L<sup>-1</sup> nitric acid and 4% (m/v) thiourea solution, eluent volume: 0.5 mL, elution time: 2 min.

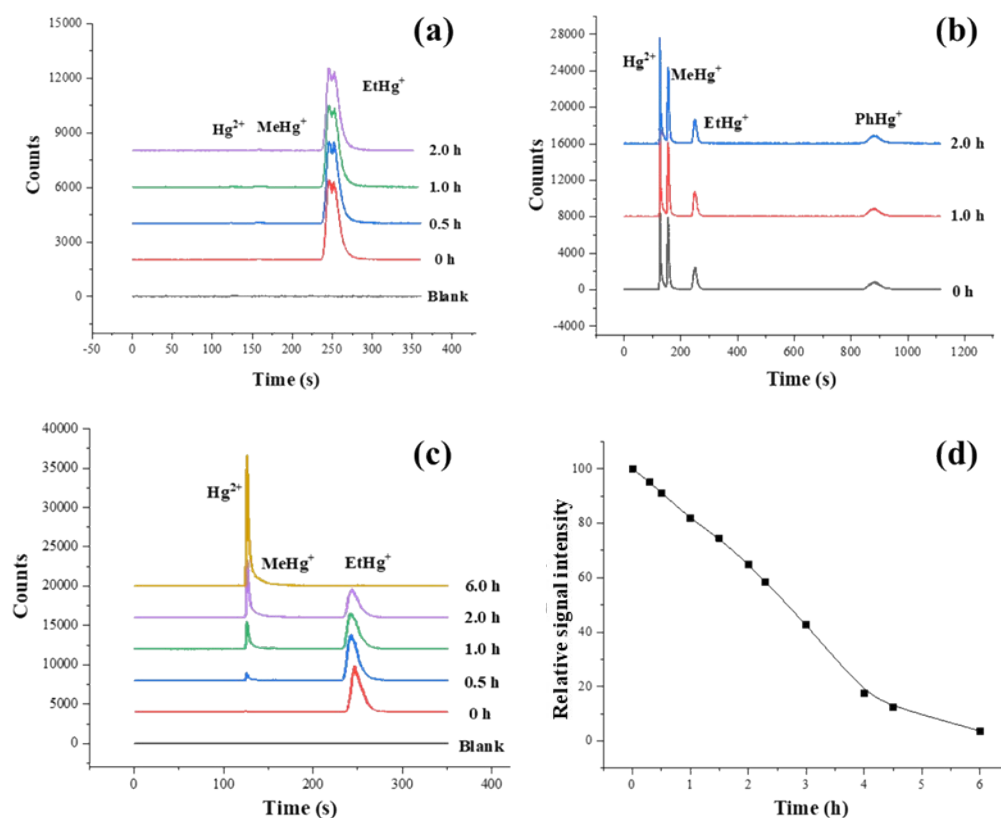

**Figure S6** Stability of EtHg<sup>+</sup>. (a) HPLC-ICP-MS chromatograms of 400 µg L<sup>-1</sup> EtHg<sup>+</sup> in 0.5 M HNO<sub>3</sub> for different times, (b) HPLC-ICP-MS chromatograms four mercury species (200 µg L<sup>-1</sup>) retained on the MOPs with different times prior to elution, HPLC-ICP-MS chromatograms (c) and the conversion rate (d) of 400 µg L<sup>-1</sup> EtHg<sup>+</sup> in 0.5 M HNO<sub>3</sub> and 4% (m/v) thiourea solution for different times.

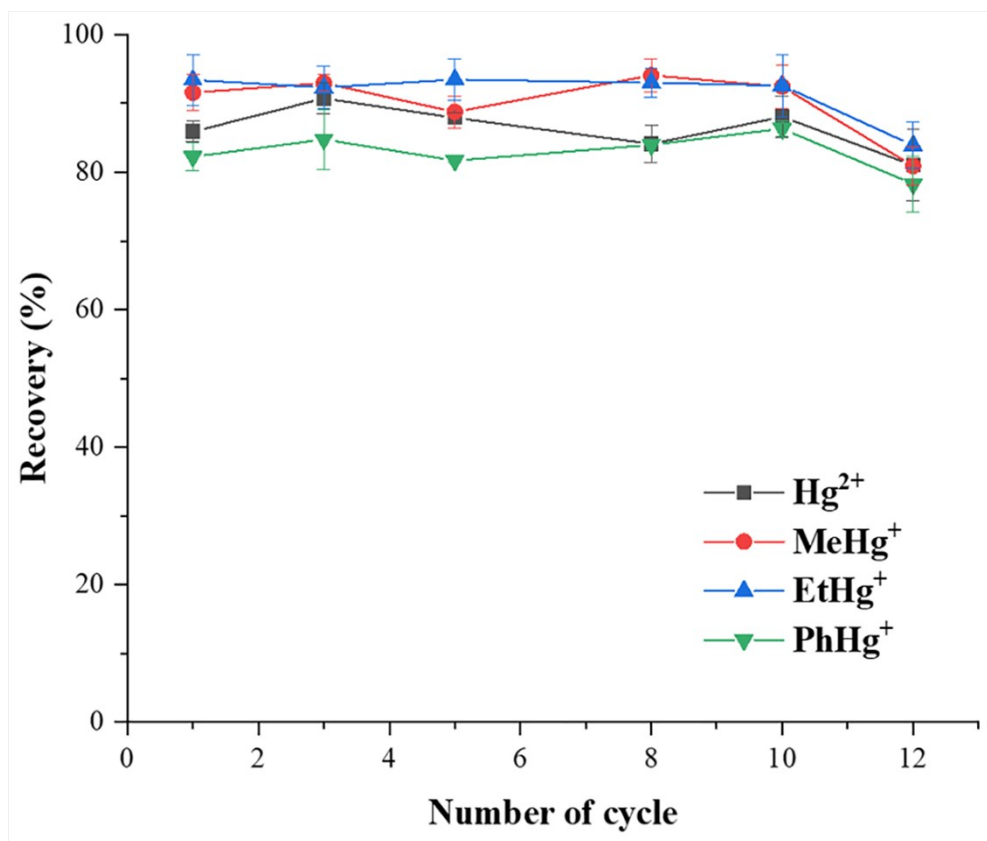

**Figure S7** The lifetime of the  $\text{Fe}_3\text{O}_4@\text{BD-TpMA-S-SH}$  MOPs.

**Table S1** Optimized operating conditions for HPLC-ICP-MS

| Instruments | Factor                  | Condition                                                                                                                  |
|-------------|-------------------------|----------------------------------------------------------------------------------------------------------------------------|
| HPLC        | Column                  | C18 column (Hypersil ODS2, 250×4.6 mm, 5 µm)                                                                               |
|             | Mobile phase            | 8.0 mM L-cysteine, 12.5 mM (NH <sub>4</sub> ) <sub>2</sub> HPO <sub>4</sub> , 0.05% Triethylamine, pH 7.0, methanol (8:92) |
|             | Temperature             | 50 °C                                                                                                                      |
|             | Flow rate               | 1.5 mL min <sup>-1</sup>                                                                                                   |
|             | Injection volume        | 50 µL                                                                                                                      |
| ICP-MS      | RF power                | 1150 W                                                                                                                     |
|             | Plasma gas flow rate    | 14.0 L min <sup>-1</sup>                                                                                                   |
|             | Carrier gas flow rate   | 1.0 L min <sup>-1</sup>                                                                                                    |
|             | Auxiliary gas flow rate | 0.5 L min <sup>-1</sup>                                                                                                    |
|             | Sampling depth          | 6.9 mm                                                                                                                     |
|             | Quantification          | Peak area                                                                                                                  |
|             | Dwell time              | 100 ms                                                                                                                     |
|             | Monitored isotope       | <sup>199</sup> Hg, <sup>200</sup> Hg, <sup>202</sup> Hg                                                                    |

**Table S2** The elemental composition and content of Fe<sub>3</sub>O<sub>4</sub>@BD-TpMA-S-SH

| Element | At. % | Wt. % |
|---------|-------|-------|
| C       | 72.4  | 58.0  |
| O       | 11.9  | 12.7  |
| N       | 3.60  | 3.70  |
| S       | 12.1  | 25.9  |

**Table S3** Comparison of Fe<sub>3</sub>O<sub>4</sub>@BD-TpMA-S-SH MNPs with other sorbents

| Analytes                                                                  | Sorbents                                                   | Application      | Samples                               | Sulfur content (wt.%) | Magnetic intensity (emu g <sup>-1</sup> ) | Adsorption capacity (mg g <sup>-1</sup> )                                     | Ref. |
|---------------------------------------------------------------------------|------------------------------------------------------------|------------------|---------------------------------------|-----------------------|-------------------------------------------|-------------------------------------------------------------------------------|------|
| Hg <sup>0</sup> , Hg <sup>2+</sup>                                        | COF-S-SH                                                   | Metal removal    | Water, air                            | 20.9                  | --                                        | 1350 (Hg <sup>2+</sup> )                                                      | 4    |
| Hg <sup>0</sup> , Hg <sup>2+</sup>                                        | POP-SH                                                     | Metal removal    | Water, air                            | 16.3                  | --                                        | 1216(Hg <sup>2+</sup> )                                                       | 5    |
| Hg <sup>2+</sup>                                                          | PAF-1-SH                                                   | Metal removal    | Water                                 | 17.6                  | --                                        | 1014                                                                          | 6    |
| Hg <sup>2+</sup>                                                          | TAPB-BMTTPA-COF                                            | Metal removal    | Water                                 | 15.5                  | --                                        | 734                                                                           | 7    |
| Hg <sup>2+</sup> , Pb <sup>2+</sup>                                       | PTMT                                                       | Metal removal    | Water                                 | 52.7                  | --                                        | 735(Hg <sup>2+</sup> )                                                        | 8    |
| Hg <sup>2+</sup>                                                          | MOP-SH                                                     | Metal removal    | Water                                 | 12.4                  | 16.0                                      | 703                                                                           | 9    |
| Hg <sup>2+</sup>                                                          | AzoPOP-SH                                                  | Metal removal    | Water                                 | --                    | 6.47                                      | 910                                                                           | 10   |
| Hg <sup>2+</sup>                                                          | SH-Fe <sub>3</sub> O <sub>4</sub> -MNPs                    | Metal removal    | Water                                 | --                    | 19.9                                      | 523                                                                           | 11   |
| Hg <sup>2+</sup>                                                          | THS-DES@M-GO                                               | Metal removal    | Water                                 | --                    | --                                        | 215                                                                           | 12   |
| Hg <sup>+</sup> , MeHg <sup>+</sup> , EtHg <sup>+</sup>                   | Fe <sub>3</sub> O <sub>4</sub> @SiO <sub>2</sub> -RSH      | DSPE-HPLC-AFS    | Ground and river water                | 0.2                   | --                                        | 12.7(MeHg <sup>+</sup> )<br>12.9(EtHg <sup>+</sup> )                          | 13   |
| Hg <sup>2+</sup>                                                          | Fe <sub>3</sub> O <sub>4</sub> @HKUST-1                    | MSPE-CV-AAS      | Fish samples                          | --                    | 19.0                                      | 254                                                                           | 14   |
| Cd <sup>2+</sup> , Cu <sup>2+</sup> , Hg <sup>2+</sup> , Pb <sup>2+</sup> | γ-MPTS-SCMNPs                                              | MSPE-ICP-MS      | Environmental and biological samples  | --                    | --                                        | 83.8 (Hg <sup>2+</sup> )                                                      | 2    |
| Hg <sup>2+</sup> , MeHg <sup>+</sup> , PhHg <sup>+</sup>                  | Fe <sub>3</sub> O <sub>4</sub> @SiO <sub>2</sub> @γ-MPTS   | MSPE-HPLC-ICP-MS | Water and fish samples                | 0.61                  | --                                        | 29.8(Hg <sup>2+</sup> )                                                       | 3    |
| Hg <sup>2+</sup> , MeHg <sup>+</sup> , PhHg <sup>+</sup>                  | Fe <sub>3</sub> O <sub>4</sub> @SiO <sub>2</sub> @GMA-S-SH | MSPE-HPLC-ICP-MS | Farmland water, soil and rice samples | 2.5                   | 6.94                                      | 141(Hg <sup>2+</sup> )<br>142(MeHg <sup>+</sup> )<br>32.1(PhHg <sup>+</sup> ) |      |

|                                                                                 |              |                  |                       |      |      |                        |           |
|---------------------------------------------------------------------------------|--------------|------------------|-----------------------|------|------|------------------------|-----------|
|                                                                                 | BD-TpMA-S-SH |                  |                       |      | --   | 940(Hg <sup>2+</sup> ) |           |
| Hg <sup>2+</sup> , MeHg <sup>+</sup> , EtHg <sup>+</sup> ,<br>PhHg <sup>+</sup> | MOP-1        | MSPE-HPLC-ICP-MS | East Lake water, fish | 25.9 | 39.2 | 636(Hg <sup>2+</sup> ) | This work |
|                                                                                 | MOP-2        |                  |                       |      | 51.1 | 520(Hg <sup>2+</sup> ) |           |
|                                                                                 | MOP-3        |                  |                       |      | 59.5 | 379(Hg <sup>2+</sup> ) |           |

**Table S4** Tolerance limits of coexisting ions

| Coexisting ions                                        | Tolerance limit (mg L <sup>-1</sup> ) | Tolerance fold <sup>a</sup> |
|--------------------------------------------------------|---------------------------------------|-----------------------------|
| K <sup>+</sup> , Na <sup>+</sup>                       | 10,000                                | 1,000,000,000               |
| Ca <sup>2+</sup> , Mg <sup>2+</sup>                    | 5,000                                 | 500,000,000                 |
| Al <sup>3+</sup>                                       | 2,000                                 | 200,000,000                 |
| Zn <sup>2+</sup> , Fe <sup>3+</sup> , Mn <sup>2+</sup> | 200                                   | 20,000,000                  |
| Cu <sup>2+</sup> , Cd <sup>2+</sup> , Pb <sup>2+</sup> | 100                                   | 10,000,000                  |
| NO <sub>3</sub> <sup>-</sup>                           | 30,000                                | 3,000,000,000               |
| Cl <sup>-</sup>                                        | 5,000                                 | 500,000,000                 |
| SO <sub>4</sub> <sup>2-</sup>                          | 5,000                                 | 500,000,000                 |
| PO <sub>4</sub> <sup>3-</sup>                          | 5,000                                 | 500,000,000                 |

a: tolerance fold is the ratio of the tolerance limit to the concentration of target mercury species (10 ng L<sup>-1</sup>)



**Table S5** The comparison of analytical performance of methodologies for mercury speciation

| Sample                                              | Analytes                                                                     | Analytical Technique | Sample preparation time (min) | Separation time (min) | EFs     | LOD (ng L <sup>-1</sup> ) | Linear range (ng L <sup>-1</sup> ) | Ref.      |
|-----------------------------------------------------|------------------------------------------------------------------------------|----------------------|-------------------------------|-----------------------|---------|---------------------------|------------------------------------|-----------|
| Human hair, water                                   | Hg <sup>2+</sup> , MeHg <sup>+</sup>                                         | MSPE-ICP-MS          | 15                            | --                    | 50      | 1.6-1.9                   | 10-10000                           | 15        |
| Water, fish                                         | Hg <sup>2+</sup> , MeHg <sup>+</sup> , PhHg <sup>+</sup>                     | MSPE-HPLC-ICP-MS     | 17                            | 8                     | 174-179 | 0.5-0.7                   | 5-5000                             | 2         |
| Natural water                                       | Hg <sup>2+</sup> , MeHg <sup>+</sup>                                         | MSPE-HPLC-ICP-MS     | 10                            | 5                     | 200     | 0.3-1                     | 5-30                               | 16        |
| Farmland water, soil, rice                          | Hg <sup>2+</sup> , MeHg <sup>+</sup> , PhHg <sup>+</sup>                     | MSPE-HPLC-ICP-MS     | 7                             | 17                    | 329-380 | 0.4-1.4                   | 5-5000                             | 3         |
| Atmospheric particles, water, fish, plant, sediment | Hg <sup>2+</sup> , MeHg <sup>+</sup> , EtHg <sup>+</sup> , PhHg <sup>+</sup> | HF-LLLME-HPLC-ICP-MS | 30                            | 12                    | 221-236 | 2.9-5.6                   | 20-5000                            | 17        |
| Sediment, water                                     | Hg <sup>2+</sup> , MeHg <sup>+</sup> , EtHg <sup>+</sup> , PhHg <sup>+</sup> | SPE-HPLC-ICP-MS      | 100-250                       | 10                    | 100     | 500-1000                  | 1000-10000                         | 18        |
| Fish                                                | Hg <sup>2+</sup> , MeHg <sup>+</sup>                                         | MSPD-HPLC-ICP-MS     | 35                            | 4                     | 10      | 8400-9900                 | --                                 | 19        |
| Water                                               | Hg <sup>2+</sup> , MeHg <sup>+</sup>                                         | SPE-CV-AAS           | 10                            | --                    | 25      | 1.5-2.1                   | --                                 | 20        |
| Water, Caprine Blood                                | Hg <sup>2+</sup> , MeHg <sup>+</sup> , EtHg <sup>+</sup>                     | SPE-CV-AAS           | 3                             | --                    | 10      | 10                        | 30-65                              | 21        |
| Water                                               | Hg <sup>2+</sup> , MeHg <sup>+</sup>                                         | GC-pyro-AFS          | 30                            | 6                     | 150     | 5.4                       | 20-2000                            | 22        |
| Ground and river water                              | Hg <sup>2+</sup> , MeHg <sup>+</sup> , EtHg <sup>+</sup>                     | DSPE-HPLC-AFS        | 5                             | 6                     | 428-596 | 0.26-1.7                  | 2-15                               | 23        |
| East Lake water, fish                               | Hg <sup>2+</sup> , MeHg <sup>+</sup> , EtHg <sup>+</sup> , PhHg <sup>+</sup> | MSPE-HPLC-ICP-MS     | 7                             | 17                    | 346-383 | 0.43-1.1                  | 5-5000                             | This work |

## Reference

1. J. Liu, Z. Sun, Y. Deng, Y. Zou, C. Li, X. Guo, L. Xiong, Y. Gao, F. Li and D. Zhao, *Angew. Chem.-Int. Ed.*, 2009, **48**, 5875-5879.
2. Q.S. Zhu, B.B. Chen, M. He, T. Huang and B. Hu, *Talanta*, 2017, **171**, 213-219.
3. Y.F. He, M. He, K. Nan, R.K. Cao, B.B. Chen and B. Hu, *J. Chromatogr. A*, 2019, **1595**, 19-27.
4. Q. Sun, B. Aguila, J. Perman, L.D. Earl, C.W. Abney, Y.C. Cheng, H. Wei, N. Nguyen, L. Wojtas and S.Q. Ma, *J. Am. Chem. Soc.*, 2017, **139**, 2786-2793.
5. B. Aguila, Q. Sun, J.A. Perman, L.D. Earl, C.W. Abney, R. Elzein, R. Schlaf and S.Q. Ma, *Adv. Mater.*, 2017, **29**, 1700665.
6. B.Y. Li, Y.M. Zhang, D.X. Ma, Z. Shi and S.Q. Ma, *Nat. Commun.*, 2014, **5**, 5537.
7. N. Huang, L.P. Zhai, H. Xu and D.L. Jiang, *J. Am. Chem. Soc.*, 2017, **139**, 2428-2434.
8. X.P. Li, C.Q. Bian, X.J. Meng and F.S. Xiao, *J. Mater. Chem. A*, 2016, **4**, 5999-6005.
9. L.J. Huang, C.Y. Peng, Q. Cheng, M. He, B.B. Chen and B. Hu, *Ind. Eng. Chem. Res.*, 2017, **56**, 13696-13703.
10. S.D. Pan, Y. Zhang, H.Y. Shen and M.Q. Hu, *Chem. Eng. J.*, 2012, **210**, 564-574.
11. J. Chen, Y. Wang, X. Wei, P. Xu, W. Xu, R. Ni and J. Meng, *Talanta*, 2018, **188**, 454-462.
12. G. Li, Z. Zhang, C. Geng, Z. Li, X. Tian, S. Ai and D. Bian, *Int. J. Environ. Anal. Chem.*, 2017, **97**, 657-672.
13. A. Tadjarodi and A. Abbaszadeh, *Microchim. Acta*, 2016, **183**, 1391-1399.
14. C.Z. Huang and B. Hu, *Spectrochim. Acta B.*, 2008, **63**, 437-444.
15. S.S. Ma, M. He, B.B. Chen, W.C. Deng, Q. Zheng and B. Hu, *Talanta*, 2016, **146**, 93-99.
16. S.X. Zhang, H. Luo, Y.Y. Zhang, X.Y. Li, J.S. Liu, Q. Xu and Z.H. Wang, *Microchem. J.*, 2016, **126** 25-31.
17. B.B. Chen, Y.L. Wu, X.Q. Guo, M. He and B. Hu, *J. Anal. At. Spectrom.*, 2015, **30**, 875-881.
18. J.S. dos Santos, M. de la Guardia, A. Pastor and M.L. Pires dos Santos, *Talanta*, 2009, **80**, 207-211.
19. D.Y. Deng, S. Zhang, H. Chen, L. Yang, H. Yin, X.D. Hou and C.B. Zheng, *J. Anal. At. Spectrom.*, 2015, **30**, 882-887.
20. M. Tuzen, I. Karaman, D. Citak and M. Soylak, *Food Chem. Toxicol.*, 2009, **47**, 1648-1652.

21. H. Shirkhanloo, A. Khaligh, H.Z. Mousavi and A. Rashidi, *Microchem. J.*, 2017, **130**, 245-254.
22. A.I. Corps Ricardo, A. Sanchez-Cachero, M. Jimenez-Moreno, F.J. Guzman Bernardo, R.C. Rodriguez Martin-Doimeadios and A. Rios, *Talanta*, 2018, **179**, 442-447.
23. G. Li, Z. Zhang, C. Geng, Z. Li, X. Tian, S. Ai and D. Bian, *Int. J. Environ. Anal. Chem.*, 2017, **97**, 657-672.
